# Supplementary material for: Individual and combined contributions of age-specific and sex-specific pulse pressure and brachial-ankle pulse wave velocity to the risk of new-onset diabetes mellitus
Source: PubMed Central journal article supplement — BMJ Open Diabetes Res Care. 2021 Jun 21;9(1):e001942. doi: 10.1136/bmjdrc-2020-001942 (PMC8217932; doi:10.1136/bmjdrc-2020-001942), 2021-06-21
Supplement: bmjdrc-2020-001942supp001.pdf [file bmjdrc-2020-001942supp001.pdf]

## Supplemental Material

Table S1. Age- and sex-specific median values for PP and baPWV

| Age<br>(year) | Men  |          |             | Women |          |             |
|---------------|------|----------|-------------|-------|----------|-------------|
|               | N    | PP(mmHg) | baPWV(cm/s) | N     | PP(mmHg) | baPWV(cm/s) |
| 20-24         | 221  | 48.00    | 1195.00     | 27    | 39.67    | 1061.00     |
| 25-29         | 725  | 46.33    | 1267.00     | 193   | 38.80    | 1070.00     |
| 30-34         | 933  | 46.00    | 1347.00     | 540   | 40.00    | 1126.50     |
| 35-39         | 1200 | 45.33    | 1374.00     | 585   | 40.00    | 1167.00     |
| 40-44         | 2012 | 44.00    | 1410.00     | 1252  | 40.00    | 1228.50     |
| 45-49         | 2358 | 45.00    | 1453.00     | 1535  | 40.00    | 1298.00     |
| 50-54         | 2219 | 47.00    | 1484.00     | 642   | 40.83    | 1386.50     |
| 55-59         | 841  | 49.33    | 1532.00     | 473   | 48.67    | 1450.00     |
| 60-64         | 672  | 50.00    | 1602.50     | 437   | 50.00    | 1604.00     |
| 65-69         | 397  | 53.33    | 1688.00     | 194   | 54.00    | 1713.50     |
| 70-74         | 384  | 56.00    | 1841.50     | 168   | 57.67    | 1897.00     |
| 75-79         | 256  | 60.00    | 1972.00     | 75    | 60.00    | 2000.00     |
| 80-84         | 170  | 68.17    | 2075.00     | 32    | 61.00    | 2085.00     |
| 85-89         | 58   | 60.33    | 2129.50     | 8     | 65.00    | 2159.00     |
| ≥90           | 12   | 71.00    | 2184.50     | 0     | .        | .           |

**Table S2. Sensitivity analysis on the effects of different PP and baPWV combination on the new-onset diabetes events.**

| Groups                                                                                 | N    | Events | Incidence density<br>(persons per year) | Model 1<br>HR (95%CI) | Model 2<br>HR (95%CI) |
|----------------------------------------------------------------------------------------|------|--------|-----------------------------------------|-----------------------|-----------------------|
| <b>Excluding participants who were taking antihypertensive or lipid-lowering drugs</b> |      |        |                                         |                       |                       |
| Normal PP and baPWV                                                                    | 4951 | 149    | 6.73                                    | Ref.                  | Ref.                  |
| Normal PP and increased baPWV                                                          | 3030 | 148    | 11.54                                   | 1.90(1.51-2.38)       | 1.47(1.16-1.86)       |
| Increased PP and normal baPWV                                                          | 3609 | 104    | 7.26                                    | 1.31(1.02-1.68)       | 1.07(0.82-1.39)       |
| Increased PP and baPWV                                                                 | 4646 | 250    | 13.68                                   | 2.48(2.02-3.04)       | 1.61(1.28-2.02)       |
| <b>Excluding participants with ABI ≤ 0.9</b>                                           |      |        |                                         |                       |                       |
| Normal PP and baPWV                                                                    | 5143 | 174    | 7.50                                    | Ref.                  | Ref.                  |
| Normal PP and increased baPWV                                                          | 3420 | 192    | 12.95                                   | 1.83(1.49-2.25)       | 1.45(1.17-1.80)       |
| Increased PP and normal baPWV                                                          | 3845 | 122    | 7.85                                    | 1.21(0.96-1.53)       | 1.05(0.83-1.33)       |
| Increased PP and baPWV                                                                 | 5662 | 356    | 15.10                                   | 2.26(1.88-2.71)       | 1.56(1.27-1.92)       |

Model 1, adjusted for age; Model 2, adjusted for age, BMI, MAP, hs-CRP, smoking, drinking, exercise, hyperlipidemia, family history of diabetes, antihypertensive drugs.

**Table S3. Risk of different PP and baPWV combination on the new-onset diabetes events in the male population**

| Groups                  | N    | Events | Incidence density<br>(persons per year) | Model 1<br>HR (95%CI) | Model 2<br>HR (95%CI) |
|-------------------------|------|--------|-----------------------------------------|-----------------------|-----------------------|
| Normal PP and baPWV     | 3644 | 130    | 8.42                                    | Ref.                  | Ref.                  |
| Normal PP and increased | 2437 | 144    | 14.98                                   | 1.87(1.48-2.37)       | 1.72(1.35-2.20)       |

| baPWV                            |      |     |       |                 |                 |
|----------------------------------|------|-----|-------|-----------------|-----------------|
| Increased PP and normal<br>baPWV | 2563 | 88  | 9.52  | 1.27(0.97-1.67) | 1.20(0.91-1.59) |
| Increased PP and baPWV           | 3814 | 258 | 18.26 | 2.41(1.95-2.97) | 2.12(1.67-2.69) |

Model 1, adjusted for age; Model 2, adjusted for age, BMI, MAP, hs-CRP, smoking, drinking, exercise, hyperlipidemia, family history of diabetes, antihypertensive drugs.

**Table S4. Risk of different PP and baPWV combination on the new-onset diabetes events in the female population**

| Groups                           | N    | Events | Incidence density<br>(persons per year) | Model 1<br>HR (95%CI) | Model 2<br>HR (95%CI) |
|----------------------------------|------|--------|-----------------------------------------|-----------------------|-----------------------|
| Normal PP and baPWV              | 1651 | 48     | 5.69                                    | Ref.                  | Ref.                  |
| Normal PP and increased<br>baPWV | 1069 | 57     | 10.17                                   | 1.92(1.30-2.82)       | 1.63(1.10-2.42)       |
| Increased PP and normal<br>baPWV | 1419 | 40     | 5.81                                    | 1.20(0.79-1.84)       | 0.96(0.62-1.47)       |
| Increased PP and baPWV           | 2022 | 112    | 10.99                                   | 2.08(1.48-2.93)       | 1.25(0.85-1.84)       |

Model 1, adjusted for age; Model 2, adjusted for age, BMI, MAP, hs-CRP, smoking, drinking, exercise, hyperlipidemia, family history of diabetes, antihypertensive drugs.

**Table S5. Risk of different PP and baPWV combination on the new-onset diabetes events in the age $\geq$ 60 population**

| Groups                           | N   | Events | Incidence density<br>(persons per year) | Model 1<br>HR (95%CI) | Model 2<br>HR (95%CI) |
|----------------------------------|-----|--------|-----------------------------------------|-----------------------|-----------------------|
| Normal PP and baPWV              | 822 | 45     | 11.07                                   | Ref.                  | Ref.                  |
| Normal PP and increased<br>baPWV | 497 | 33     | 13.19                                   | 1.18(0.75-1.85)       | 1.07(0.67-1.72)       |
| Increased PP and normal<br>baPWV | 606 | 40     | 14.28                                   | 1.32(0.86-2.02)       | 1.16(0.73-1.83)       |
| Increased PP and baPWV           | 938 | 73     | 16.20                                   | 1.47(1.01-2.13)       | 1.42(0.93-2.17)       |

Model 1, adjusted for age and gender; Model 2, adjusted for age, gender, BMI, MAP, hs-CRP, smoking, drinking, exercise, hyperlipidemia, family history of diabetes, antihypertensive drugs.

**Table S6. Risk of different PP and baPWV combination on the new-onset diabetes events in the age $<$ 60 population**

| Groups                           | N    | Events | Incidence density<br>(persons per year) | Model 1<br>HR (95%CI) | Model 2<br>HR (95%CI) |
|----------------------------------|------|--------|-----------------------------------------|-----------------------|-----------------------|
| Normal PP and baPWV              | 4473 | 133    | 6.72                                    | Ref.                  | Ref.                  |
| Normal PP and increased<br>baPWV | 3009 | 168    | 13.22                                   | 2.14(1.70-2.69)       | 1.88(1.48-2.37)       |
| Increased PP and normal<br>baPWV | 3376 | 88     | 6.60                                    | 1.20(0.91-1.57)       | 1.07(0.81-1.41)       |
| Increased PP and baPWV           | 4898 | 297    | 14.99                                   | 2.59(2.11-3.18)       | 1.92(1.53-2.42)       |

Model 1, adjusted for age and gender; Model 2, adjusted for age, gender, BMI, MAP, hs-CRP, smoking, drinking, exercise, hyperlipidemia, family history of diabetes, antihypertensive drugs.

There are 1444 participants with prediabetes at baseline. To assess the potential confounding effects of prediabetes, we performed a sensitivity analysis excluding prediabetic patients.

**Table S7. Risk of different PP and baPWV combination on the new-onset diabetes events**

| Groups                           | N    | Events | Incidence density<br>(persons per year) | Model 1<br>HR (95%CI) | Model 2<br>HR (95%CI) |
|----------------------------------|------|--------|-----------------------------------------|-----------------------|-----------------------|
| Normal PP and baPWV              | 5020 | 133    | 5.88                                    | Ref.                  | Ref.                  |
| Normal PP and increased<br>baPWV | 3253 | 142    | 10.01                                   | 1.83(1.45-2.33)       | 1.63(1.28-2.08)       |
| Increased PP and normal<br>baPWV | 3682 | 80     | 5.35                                    | 1.07(0.81-1.42)       | 0.97(0.73-1.29)       |
| Increased PP and baPWV           | 5220 | 242    | 11.05                                   | 2.12(1.71-2.62)       | 1.63(1.28-2.07)       |

Model 1, adjusted for age and gender; Model 2, adjusted for age, gender, BMI, MAP, hs-CRP, smoking, drinking, exercise, hyperlipidemia, family history of diabetes, antihypertensive drugs.

There were 103 pregnancies during the follow-up period, and 27 were diagnosed with gestational diabetes. To assess the potential confounding effects of gestational diabetes, we performed a sensitivity analysis excluding gestational diabetes.

**Table S8. Risk of different PP and baPWV combination on the new-onset diabetes events**

| Groups                           | N    | Events | Incidence density<br>(persons per year) | Model 1<br>HR (95%CI) | Model 2<br>HR (95%CI) |
|----------------------------------|------|--------|-----------------------------------------|-----------------------|-----------------------|
| Normal PP and baPWV              | 5289 | 178    | 7.47                                    | Ref.                  | Ref.                  |
| Normal PP and increased<br>baPWV | 3501 | 201    | 13.23                                   | 1.88(1.53-2.30)       | 1.66(1.35-2.05)       |
| Increased PP and normal<br>baPWV | 3976 | 128    | 7.95                                    | 1.23(0.98-1.54)       | 1.09(0.86-1.37)       |
| Increased PP and baPWV           | 5826 | 370    | 15.24                                   | 2.29(1.91-2.73)       | 1.74(1.43-2.13)       |

Model 1, adjusted for age and gender; Model 2, adjusted for age, gender, BMI, MAP, hs-CRP, smoking, drinking, exercise, hyperlipidemia, family history of diabetes, antihypertensive drugs.
